# Supplementary material for: Physicians and Specialties in the Veterans Health Administration’s Community Care Network
Source: PubMed Central journal article supplement (PMC11091756; doi:10.1001/jamanetworkopen.2024.10841), 2024-05-13
Supplement: jamanetwopen-e2410841-s002.pdf [file jamanetwopen-e2410841-s002.pdf]

## Data Sharing Statement

Feyman. Physicians and Specialties in the Veterans Health Administration's Community Care Network. *JAMA Netw Open*. Published May 13, 2024.

doi:10.1001/jamanetworkopen.2024.10841

### Data

**Data available:** No

### Additional Information

**Explanation for why data not available:** Aggregate data will be made available, but the VA does not allow posting of administrative data.
